# Supplementary material
Source: Research Square preprint supplement (doi:10.21203/rs.3.rs-9079459/v1)
Supplement: Supplementary file 1 [file 4aadbde7bb00a33f00b54e9d.docx]

Supplementary Figures


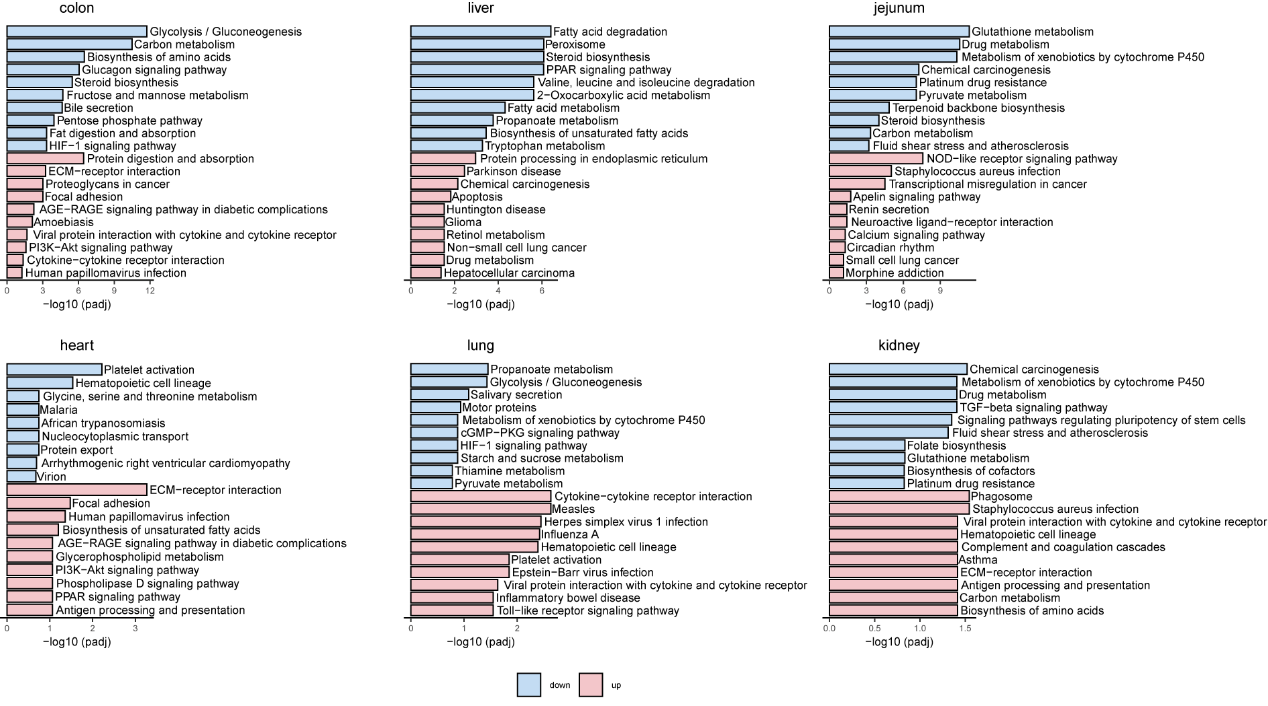


Fig S1. Varied signal pathway caused by gut microbes. KEGG pathways enrichment of overlap genes, which showed consistent expression trend in tissues of mice under both FMT and SPF, compared to mice under GF.


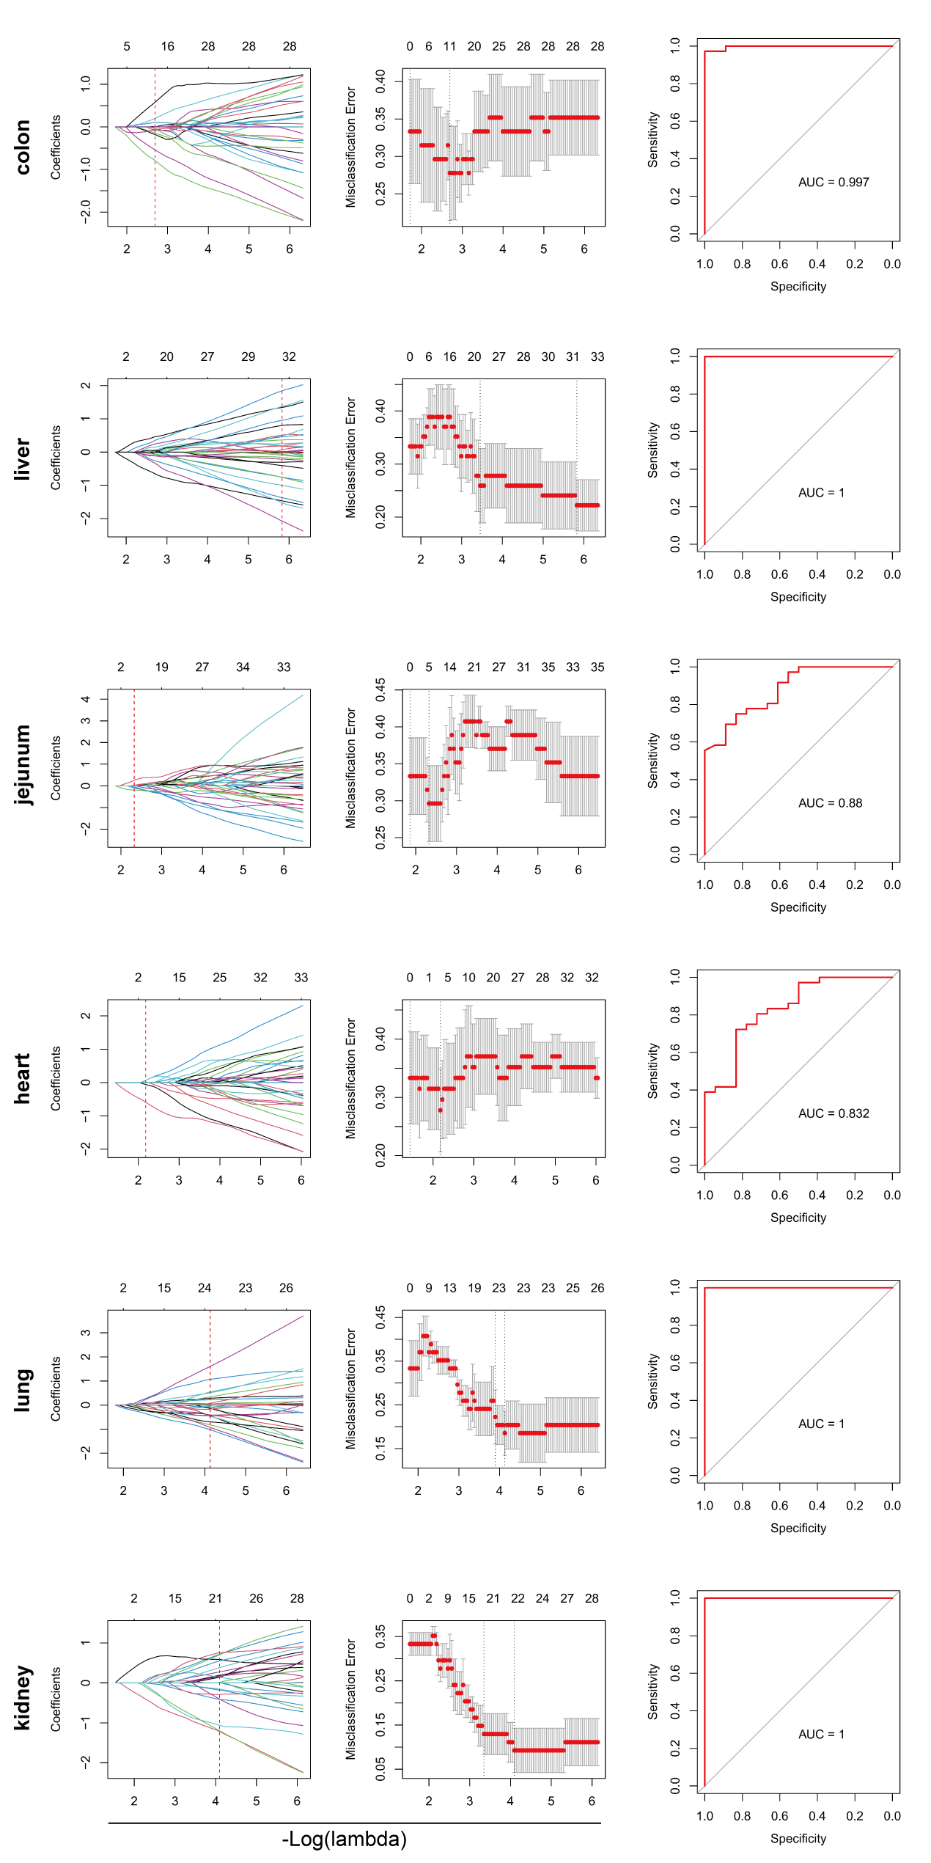


Fig S2. LASSO regression path diagram and cross validation curve. Least Absolute Shrinkage and Selection Operator (LASSO) model parameter index, include path diagram, cross validation curve and area under curve (AUC).


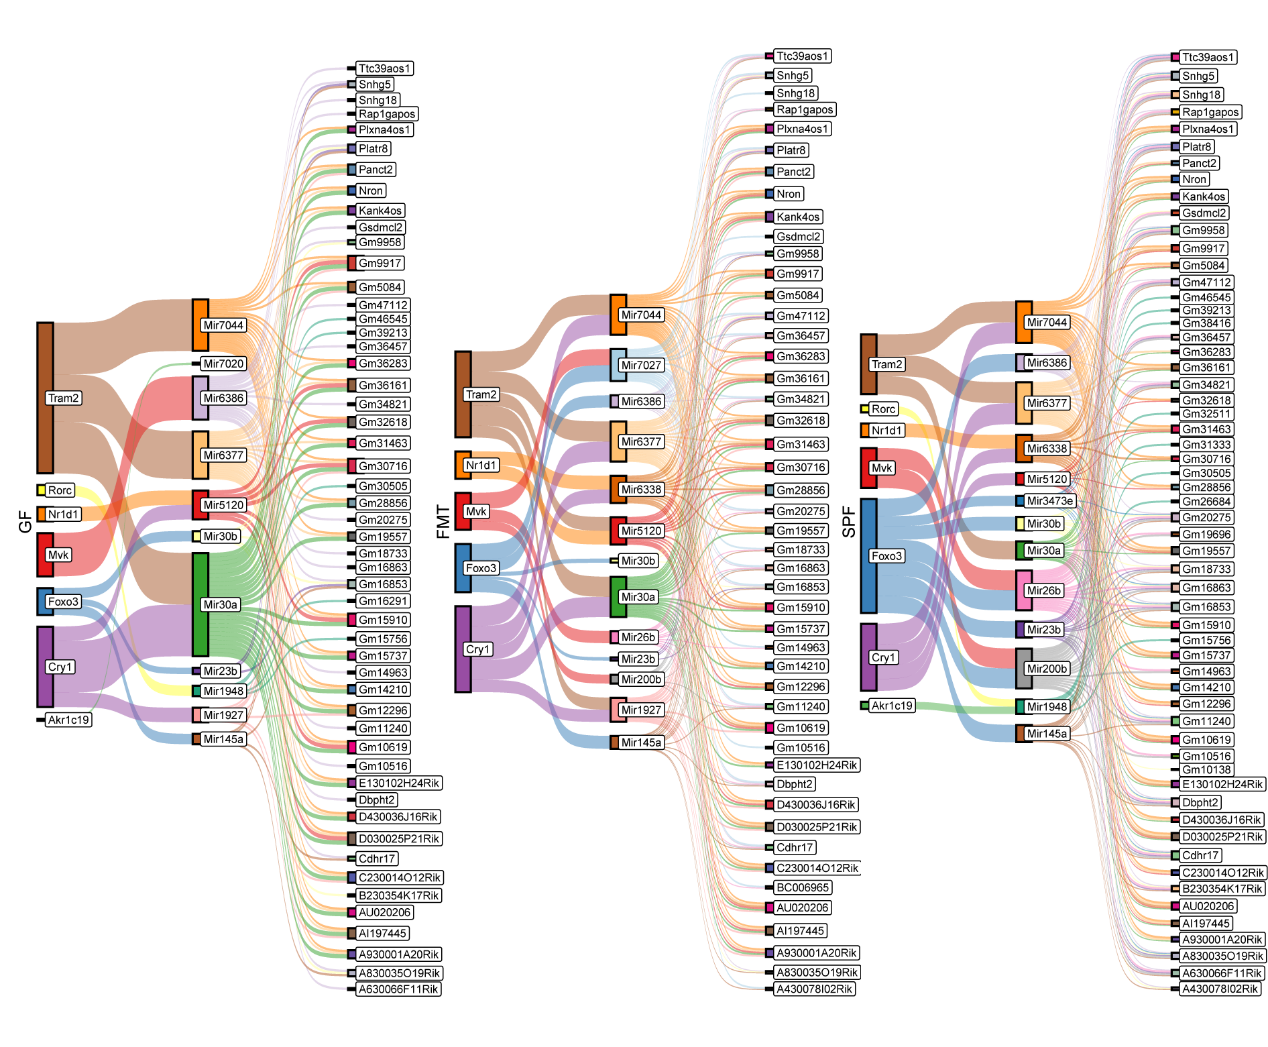


Fig S3. ceRNA network of key effector genes. Alluvial maps show the correlations between mRNA, miRNA and lncRNA. Color of each RNA are fixed to enhance the visibility of differences.
